# Supplementary material for: Co-effects of matrix low elasticity and aligned topography on stem cell neurogenic differentiation and rapid neurite outgrowth
Source: Royal Society of Chemistry journal article supplement (doi:10.1039/c6nr01169a), 2016-01-01
Supplement: c6nr01169a1.pdf [file c6nr01169a1.pdf]

Supplementary information

Table 1 Sequence of Primers for RT-PCR.

| Gene                 | Primers (F = Forward; R = Reverse)                           |
|----------------------|--------------------------------------------------------------|
| Nestin               | F: GTGACGGCACTCCCATGTG<br>R: TTTTGAAGCGGAGGCATTAC            |
| GFAP                 | F: CAGCAGCTTGC GTTAGAATGAG<br>R: CAACAGTTTCCATAACAACAGGAATC  |
| $\beta$ -tubulin III | F: GGCCTGACAATTTTCATCTTTGG<br>R: ACCACATCCAGGACCGAATC        |
| NF-L                 | F: ACCAGCGTGGGAAGCATAAC<br>R: GCGGGTGGACATCAGATAGG           |
| NF-M                 | F: CAGAAAACCTCCTGGAGGGTGAA<br>R: TGGGTTTCTGAATCTTACTGGATATTG |
| NF-H                 | F: GTCATCAGGCCGACATTGC<br>R: TCCAGAGCCATCTTGACATTGA          |
| ALP                  | F: ACCACCACGAGAGTGAACCA<br>R: CGTTGTCTGAGTACCAGTCCC          |
| Runx2                | F: TGGTACTGTCATGGCGGGTA<br>R: TCTCAGATCGTTGAACCTTGCTA        |
| AP2                  | F: CACCGACCTCCAGGACTACA<br>R: CAGTCTCCAGACATTCCACCA          |
| LPL                  | F: TCATTCCCGGAGTAGCAGAGT<br>R: GGCCACAAGTTTTGGCACC           |
| Sm22                 | F: ATGGCACGGTGCTATGTGAG<br>R: CCCACCCAGATTCATCAGCG           |
| Acta2                | F: AAAAGACAGCTACGTGGGTGA<br>R: GCCATGTTCTATCGGGTACTTC        |
| Sox9                 | F: AGCGAACGCACATCAAGAC<br>R: CTGTAGGCGATCTGTTGGGG            |
| GAPDH                | F: AACGACCCCTTCATTGAC<br>R: TCCACGACATACTCAGCAC              |

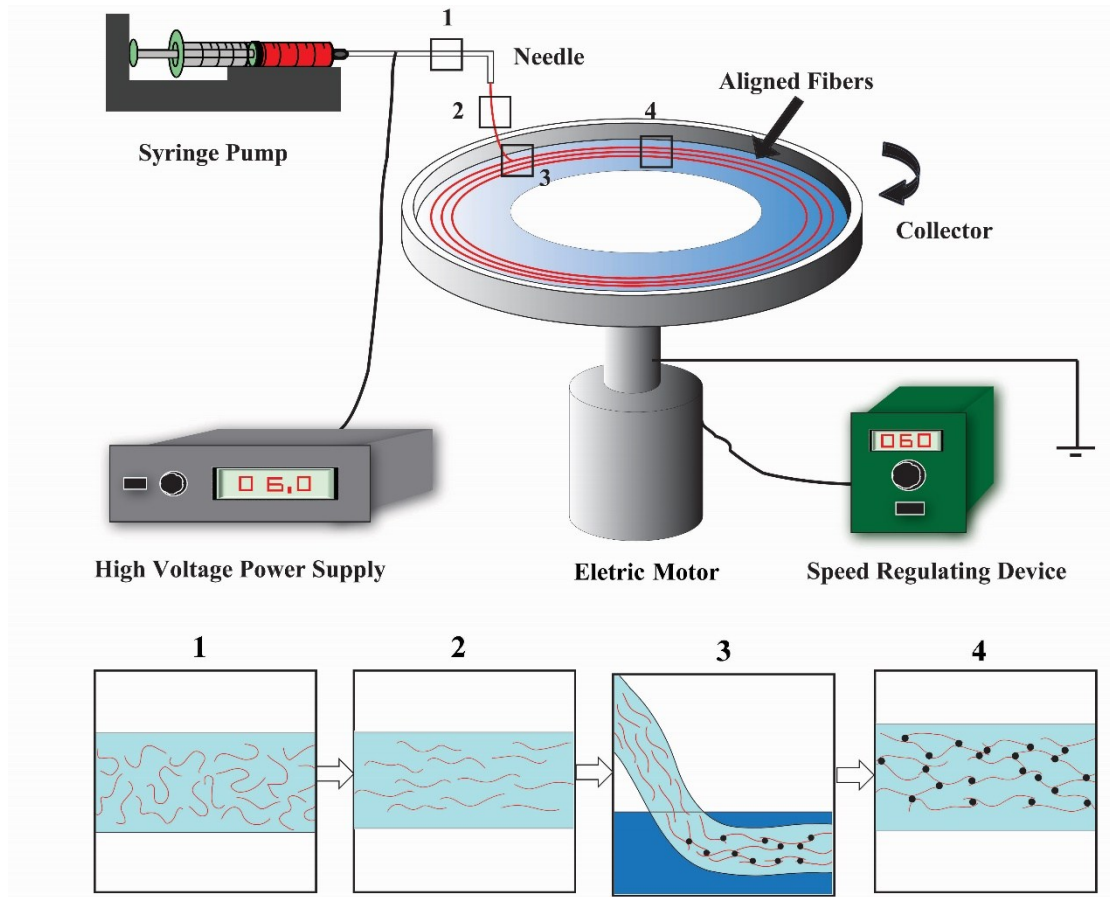

Fig.s1 A schematic diagram of the electrospinning equipment and preparation process. 1. The fibrinogen molecule was randomly distributed in the electrospinning solution. 2. The molecule in the solution was straightened under the electric potential. 3-4. Fibrin fiber formed in the collection solution by the reaction of thrombin and fibrinogen.

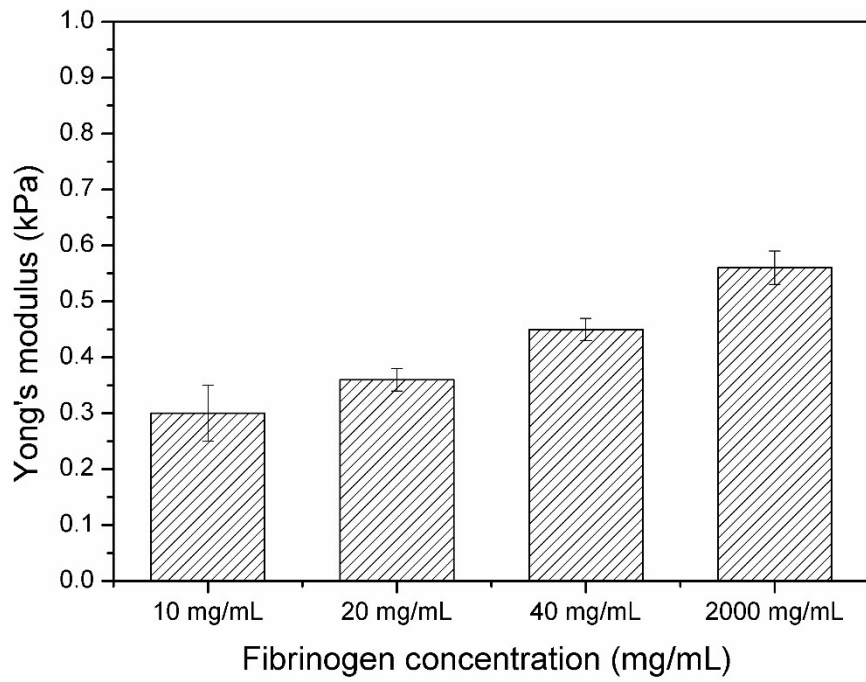

Fig.s2 Young's modulus of RFG fabricated with different concentrations of fibrinogen. RFG prepared with fibrinogen concentrations of 2000 mg/mL, 40 mg/mL, 20 mg/mL and 10 mg/mL, the Young's modulus are  $0.56 \pm 0.03$  kPa,  $0.45 \pm 0.02$  kPa,  $0.36 \pm 0.02$  kPa and  $0.30 \pm 0.05$  kPa respectively.
